# Supplementary material for: Protein Sumoylation Is Crucial for Phagocytosis in Entamoeba histolytica Trophozoites
Source: MDPI journal article supplement (doi:10.3390/ijms22115709), 2021-05-27
Supplement: s1 [file s1]

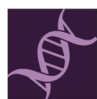

## Supplementary Material

**Table S1.** Putative SUMOylation sites in published proteins involved in *Entamoeba histolytica* phagocytosis.

| Function | Protein                     | Number access | Position  | Peptide/sequence             | Score  | Site             | Reference |
|----------|-----------------------------|---------------|-----------|------------------------------|--------|------------------|-----------|
| Retromer | Vacuolar sorting protein 29 | EHI_025270    | 3 - 7     | ****ML <b>VLVIG</b> DFHVPHR  | 64.072 | SUMO Interaction | [1]       |
|          |                             |               | 56 - 60   | LRTLARE <b>VHVVK</b> GDFDEMQ | 65.27  | SUMO Interaction |           |
|          |                             |               | 60        | AREVHV <b>VK</b> GDFDEMQ     | 44.952 | Sumoylation      |           |
|          |                             |               | 110 - 114 | QRQLDVD <b>ILITG</b> HTHKLET | 60.6   | SUMO Interaction |           |
|          |                             |               | 173       | TLVDGS <b>VK</b> CERVDFN     | 45.097 | Sumoylation      |           |
|          | Vacuolar sorting protein 26 | EHI_062490    | 9-13      | AFLFGTP <b>IQIDI</b> LLDNDHE | 72.761 | SUMO interaction | [1]       |
|          |                             |               | 40        | TEIPIYM <b>K</b> NEDVNGK     | 30.527 | Sumoylation      |           |
|          |                             |               | 145 - 149 | GLSKEQE <b>IWVIN</b> YQDEPTK | 74.151 | SUMO interaction |           |
|          |                             |               | 238       | LMDGAP <b>VK</b> GESMPIR     | 43.592 | Sumoylation      |           |
|          |                             |               | 342       | PQQSEEP <b>K</b> EEIKEPV     | 21.38  | Sumoylation      |           |
|          |                             |               | 362       | QSIQEEP <b>K</b> EEIKEEK     | 21.38  | Sumoylation      |           |
|          |                             |               | 366       | EEPKEEI <b>K</b> EEKKEEP     | 45.815 | Sumoylation      |           |
|          |                             |               | 374       | EEKKEEP <b>K</b> EEVKEEI     | 21.902 | Sumoylation      |           |
|          |                             |               | 378       | EEPKEEV <b>K</b> EEIKEEP     | 42.644 | Sumoylation      |           |

|                        |                                                |            |           |                              |        |                  |     |
|------------------------|------------------------------------------------|------------|-----------|------------------------------|--------|------------------|-----|
|                        |                                                |            | 382       | EEVKEEI <b>K</b> EEPKEEV     | 47.766 | Sumoylation      |     |
|                        |                                                |            | 386       | EEIKEEP <b>K</b> EEVKEKP     | 21.902 | Sumoylation      |     |
|                        |                                                |            | 390       | EEPKEEV <b>K</b> EKPKAID     | 39.231 | Sumoylation      |     |
|                        |                                                |            | 406       | SSFIQDD <b>K</b> QDDDNLF     | 37.443 | Sumoylation      |     |
|                        |                                                |            | 86        | TPLFMFL <b>K</b> DEYEGSL     | 25.295 | Sumoylation      |     |
|                        |                                                |            | 309       | KVLVNFI <b>K</b> SEETTL      | 49.647 | Sumoylation      |     |
|                        |                                                |            | 462 - 466 | SNMLEVI <b>IDLIS</b> KVQDQPD | 59.445 | SUMO interaction |     |
|                        |                                                |            | 476       | QDQPDDI <b>K</b> EEEIGVD     | 48.626 | Sumoylation      |     |
|                        |                                                |            | 556       | AISKMVA <b>K</b> LEHYVLA     | 17.505 | Sumoylation      |     |
|                        |                                                |            |           |                              |        |                  |     |
| ESCRT                  | Tumor susceptibility gene 101 protein putative | EHI_178530 | 35        | TSVMQYY <b>K</b> FSATVRT     | 25.383 | Sumoylation      | [2] |
|                        |                                                |            | 47 - 51   | VRTYADG <b>IILAS</b> LVGTIPI | 56.467 | SUMO interaction |     |
|                        |                                                |            | 67 - 71   | YRGSQFC <b>LPLCI</b> MYPYDYP | 56.376 | SUMO interaction |     |
|                        |                                                |            | 283       | TLTPLNT <b>K</b> *****       | 38.49  | Sumoylation      |     |
|                        | Vacuolar sorting protein VPS4                  | EHI_118900 | 78        | MISGERV <b>K</b> SDDPDKE     | 45.994 | Sumoylation      | [2] |
|                        |                                                |            | 128 - 132 | EALQEAV <b>ILPIK</b> FPQLFTD | 59.356 | SUMO interaction |     |
|                        |                                                |            | 231       | TEASRRV <b>K</b> TEFLVQM     | 41.814 | Sumoylation      |     |
| Vesicular trafficking  | EhRabB                                         | EHI_181240 | 82 - 86   | YYRGSQG <b>ILIVY</b> DVSNFDS | 63.59  | SUMO Interaction | [3] |
|                        |                                                |            | 105       | TYWIGEL <b>K</b> KENVVDGI    | 28.197 | Sumoylation      |     |
|                        | EhRab7                                         | EHI_001870 | 83-87     | FRGTDGC <b>VLVCS</b> VTSIESF | 60.125 | SUMO interaction | [4] |
|                        |                                                |            | 120       | PFVAVAN <b>K</b> SDLDPIE     | 39.109 | Sumoylation      |     |
| Actin related proteins | Actin related protein 2/3 complex, subunit 4   | EHI_030820 | 51 - 55   | KEVIFKP <b>VVIVR</b> VPSEPSG | 61.242 | SUMO interaction | [5] |

|  |                                |            |             |                       |        |                  |     |
|--|--------------------------------|------------|-------------|-----------------------|--------|------------------|-----|
|  | EhABPH (actin-binding protein) | EHI_122800 | 422         | RRSSVSLKPEHMKSI       | 26.543 | Sumoylation      | [6] |
|  |                                |            | 523 - 527   | TEEIEGK VGIVI EIDEESE | 63.088 | SUMO interaction |     |
|  |                                |            | 586         | KQETKEVKEEKTQR        | 44.223 | Sumoylation      |     |
|  |                                |            | 674 - 678   | QLTSKGN VIHLA CKNEEEL | 62.786 | SUMO interaction |     |
|  |                                |            | 698         | ACTPNNLKGEADEE        | 24.332 | Sumoylation      |     |
|  |                                |            | 753 - 757   | NRTDSTP ILKIY LKDIENI | 61.532 | SUMO interaction |     |
|  |                                |            | 787         | KGNKHEFKTEECKAW       | 18.512 | Sumoylation      |     |
|  |                                |            | 795         | TEECKAWKEEIMERK       | 24.947 | Sumoylation      |     |
|  |                                |            | 930         | VILLTHGKDDRETDM       | 37.458 | Sumoylation      |     |
|  |                                |            | 973 - 977   | QDKEEPE IIRIY RIVHNEK | 61.19  | SUMO interaction |     |
|  |                                |            | 1236 - 1240 | KIFKGKF IVHLG GYSEYYD | 63.428 | SUMO interaction |     |
|  |                                |            | 1297 - 1301 | VFKTIKG IEVIE GKDSNEE | 67.442 | SUMO interaction |     |
|  |                                |            | 1426        | ERGLKEVKIEQENEE       | 42.552 | Sumoylation      |     |
|  |                                |            | 1467 - 1471 | PVCQKKE IELIT QVIDGTF | 60.742 | SUMO interaction |     |
|  |                                |            | 1486        | NEIDPALKNEISVEG       | 25.939 | Sumoylation      |     |
|  | EhNCABP166                     | EHI_093850 | 51 - 55     | LKDLQDG IILSR YLQIETG | 60.206 | SUMO interaction | [7] |
|  |                                |            | 111 - 115   | MNGEPPK IITLM FYLMYRF | 61.066 | SUMO interaction |     |
|  |                                |            | 129 - 133   | FRLNDTP VRIID FSKWIKC | 73.317 | SUMO interaction |     |
|  |                                |            | 152         | NNPLFDLKTEFSDGI       | 28.859 | Sumoylation      |     |
|  |                                |            | 340         | LEAMELVKEESSTPI       | 45.139 | Sumoylation      |     |

|             |                       |        |                     |
|-------------|-----------------------|--------|---------------------|
| 455         | ELIIQQLKDEIIQLT       | 25.181 | Sumoylation         |
| 503 - 507   | IQKKEQE IIDIK KKNEETI | 79.148 | SUMO<br>interaction |
| 514 - 518   | KKKNEET IQLIQ KEMEKER | 64.693 | SUMO<br>interaction |
| 585         | QQELNKKKEENNEYK       | 54.425 | Sumoylation         |
| 645         | EIKEKEVKELQKIIE       | 38.869 | Sumoylation         |
| 721         | MKELERIKGEIEVLK       | 41.473 | Sumoylation         |
| 724 - 728   | LERIKGE IEVLK IKETGDS | 61.956 | SUMO<br>interaction |
| 749 - 753   | IEELKKQ IEIIK NDNEKER | 61.44  | SUMO<br>interaction |
| 877 - 881   | INELNKS IIELK EEWNKKE | 59.355 | SUMO<br>interaction |
| 881         | NKSIHELKEEWNKKE       | 26.249 | Sumoylation         |
| 923         | NENLKKVKEEIEKKT       | 43.876 | Sumoylation         |
| 1016        | ENENEIIKKENKKKE       | 49.683 | Sumoylation         |
| 1058 - 1062 | ERELGTK IKLIE MIKNEKD | 60.142 | SUMO<br>interaction |
| 1065        | IKLIEMIKNEKDIME       | 45.305 | Sumoylation         |
| 1076        | DIMEKDFKKEVDNKN       | 18.489 | Sumoylation         |
| 1100 - 1104 | IEKKKND ITLII QKNDEDK | 66.441 | SUMO<br>interaction |
| 1129        | NQEIEKIKSEKNDVQ       | 47.32  | Sumoylation         |
| 1168        | ENEKLQIKEEHENNI       | 43.513 | Sumoylation         |
| 1228        | TKKYEEVKGQIDGAH       | 40.95  | Sumoylation         |
| 1242        | HQEVENIKKETEQQI       | 42.417 | Sumoylation         |
| 1253        | EQQINQMKECEDMQ        | 29.943 | Sumoylation         |
| 1267        | QKTTFEAKEELRVQV       | 16.67  | Sumoylation         |

|                                |                                           |            |            |                       |        |                  |     |
|--------------------------------|-------------------------------------------|------------|------------|-----------------------|--------|------------------|-----|
|                                |                                           |            | 1309       | ERTIEKLKNERNEKE       | 26.905 | Sumoylation      | [8] |
|                                |                                           |            | 1354       | VMPKEVLKIDNTMLY       | 37.908 | Sumoylation      |     |
|                                |                                           |            | 7-11       | *MNKEEA ISIIQ SAIKEYC | 67.784 | SUMO interaction |     |
|                                |                                           |            | 69         | QNENAKLKNEQTKE        | 26.214 | Sumoylation      |     |
|                                |                                           |            | 183        | ELADVKKLDTTQQE        | 36.796 | Sumoylation      |     |
|                                |                                           |            | 366 - 370  | KQKGDEE IIKLH DDLAEQA | 62.69  | SUMO interaction |     |
|                                |                                           |            | 463        | AMDKELMKEEKLKQE       | 30.951 | Sumoylation      |     |
|                                |                                           |            | 468        | LMKEEKLKQEIQALK       | 26.856 | Sumoylation      |     |
|                                |                                           |            | 711        | DKEETIAKLEKDKNT       | 16.977 | Sumoylation      |     |
|                                |                                           |            | 787        | RLDIVDLKGELESKE       | 25.353 | Sumoylation      |     |
|                                |                                           |            | 934 - 938  | VADLENQ LEIHK DSIEEKD | 62.341 | SUMO interaction |     |
|                                |                                           |            | 994        | KSKYDQLKSDNLMVL       | 38.597 | Sumoylation      |     |
|                                |                                           |            | 998 - 1002 | DQLKSDN LMVLS EKEDIEE | 61.696 | SUMO interaction |     |
|                                |                                           |            | 1015       | EEELSSVKEEMTKME       | 44.303 | Sumoylation      |     |
|                                |                                           |            | 1134       | DDDYVRMKADNDKIR       | 38.706 | Sumoylation      |     |
| Cholestero<br>l<br>trafficking | Phagosome-<br>associated TMK96<br>(PATMK) | EHI_167650 | 17 - 21    | YILLFLS IEIVG EYCDWNK | 67.129 | SUMO interaction | [9] |
|                                |                                           |            | 49 - 53    | FNYNKTG VFHIR NRETETM | 61.818 | SUMO interaction |     |
|                                |                                           |            | 100 - 104  | KELNTSF IVLIN DTTINGD | 62.47  | SUMO interaction |     |
|                                |                                           |            | 222        | PSVLTKLQEVVNST        | 27.292 | SUMOylation      |     |
|                                |                                           |            | 483        | NQTRQCVKTDIHQEI       | 37.543 | SUMOylation      |     |
|                                |                                           |            | 818 - 822  | SQCSQCS IGYIV NYNGTRC | 60.948 | SUMO interaction |     |

|         |                                       |            |             |                              |        |                  |      |
|---------|---------------------------------------|------------|-------------|------------------------------|--------|------------------|------|
|         |                                       |            | 951 - 955   | YELTVSP <b>ITHL</b> KKNEGCI  | 75.893 | SUMO interaction | [10] |
|         |                                       |            | 1082 - 1086 | AVINKNN <b>VSIIT</b> EYAPYGS | 61.53  | SUMO interaction |      |
|         |                                       |            | 1143 - 1147 | RDIKLAN <b>VLIIS</b> LEDEMEI | 67.864 | SUMO interaction |      |
|         |                                       |            | 1254 - 1258 | ISLKIKS <b>LLDLM</b> WCQNPEN | 61.691 | SUMO interaction |      |
|         |                                       |            | 325 - 329   | IGFIIMG <b>IIVVG</b> FPMEGVI | 64.822 | SUMO interaction |      |
|         |                                       |            | 391 - 395   | DIIDSAK <b>VSILG</b> QEESCEE | 66.998 | SUMO interaction |      |
|         |                                       |            | 431 - 435   | FLWKFKW <b>IILTV</b> VILCCIV | 63.514 | SUMO interaction |      |
|         |                                       |            | 504 - 508   | NQVLTQP <b>LIVQL</b> QQMIDEI | 60.057 | SUMO interaction |      |
|         |                                       |            | 758 - 762   | LAIGVDN <b>IFILT</b> NTIDEQP | 66.525 | SUMO interaction |      |
|         |                                       |            | 1133        | MNSIFDV <b>K</b> TFPYAYH     | 40.095 | Sumoylation      |      |
|         |                                       |            | 1150 - 1154 | YFQQYFN IVDLC<br>VMDVCLA     | 60.804 | SUMO interaction |      |
|         |                                       |            | 1191 - 1195 | LCVLMCV <b>IDLIG</b> IMYLWGV | 60.091 | SUMO interaction |      |
|         | EhNPC1                                | EHI_080220 |             |                              |        |                  |      |
|         | EhNPC2a                               | EHI_068260 | 104         | LPGPISIK <b>F</b> EMEIPN     | 42.327 | Sumoylation      | [10] |
|         | EhNPC2b                               | EHI_188770 | 143 - 146   | SCSEFGP <b>VLVK</b> * *****  | 59.366 | SUMO interaction | [10] |
|         |                                       |            | 146         | EFGPVLV <b>K</b> *****       | 37.397 | Sumoylation      |      |
|         | Phosphatidylinositol phosphate kinase | EHI_153770 | 49          | GKTLPEL <b>K</b> NEKYIFK     | 25.986 | Sumoylation      | [11] |
| Kinases | p21-activated kinase 8 protein kinase | EHI_103610 | 151         | FVIKVIP <b>K</b> REEKILC     | 21.671 | Sumoylation      |      |
|         |                                       |            | 103 - 107   | TLCEQPS <b>ILLLM</b> QNESDFN | 62.875 | SUMO interaction | [12] |

|                          |                                 |            |           |                               |        |                  |      |
|--------------------------|---------------------------------|------------|-----------|-------------------------------|--------|------------------|------|
|                          |                                 |            | 180 - 184 | AVNGEIP <b>L</b> TILP FSDNVEI | 65.13  | SUMO interaction |      |
|                          |                                 |            | 312       | QAHIEKP <b>K</b> KEPPPEE      | 21.484 | Sumoylation      |      |
|                          |                                 |            | 67        | KPKMRVA <b>K</b> LENTEQA      | 16.205 | Sumoylation      |      |
|                          |                                 |            | 262 - 266 | PGLKTGE <b>VLVPQ</b> EFTVTAK  | 59.917 | SUMO interaction |      |
| Calcium related proteins | EhC2PK                          | EH1_094060 | 33        | VSKKRAI <b>K</b> NEQLLQL      | 46.539 | Sumoylation      | [13] |
|                          | Cation/calcium exchanger        | EH1_001770 | 46 - 50   | VSFLINY <b>LELLY</b> CYNYSWI  | 59.298 | SUMO interaction | [15] |
|                          |                                 |            | 57 - 61   | YCYNYSW <b>IVLVC</b> MVIGIII  | 62.999 | SUMO interaction |      |
|                          |                                 |            | 196 - 200 | HSIIFIL <b>IYILY</b> VCFIGYI  | 60.578 | SUMO interaction |      |
|                          |                                 |            | 336 - 340 | PFILSIG <b>IILII</b> HFTETQI  | 66.662 | SUMO interaction |      |
| Stress protein           | Heat shock protein 70           | EH1_002560 | 27        | VAYFDV <b>V</b> KGEPVILQ      | 45.554 | Sumoylation      | [16] |
|                          |                                 |            | 230       | IINDNYI <b>K</b> VESSGGD      | 48.879 | Sumoylation      |      |
|                          |                                 |            | 287       | NKKLIRL <b>K</b> KEAERIK      | 26.186 | Sumoylation      |      |
|                          |                                 |            | 294       | KKEAERI <b>K</b> IELSGKP      | 42.012 | Sumoylation      |      |
|                          |                                 |            | 300       | IKIELSG <b>K</b> PDAELDL      | 36.684 | Sumoylation      |      |
|                          |                                 |            | 366 - 370 | KKGNVQL <b>VLLIG</b> GTCEMPR  | 61.124 | SUMO interaction |      |
|                          |                                 |            | 423 - 427 | NSICSKF <b>IYDIV</b> PTPIGIE  | 64.333 | SUMO interaction |      |
| Adhesin                  | Gal/GalNAc lectin heavy subunit | EH1_012270 | 206 - 210 | TNNTSKC <b>IIDVH</b> KNNVNTH  | 60.701 | SUMO interaction | [17] |
|                          |                                 |            | 218 - 222 | KNNVNTH <b>L</b> AAIL GITDSTV | 60.45  | SUMO interaction |      |
|                          |                                 |            | 255       | GVTIYYL <b>K</b> GDSYATD      | 37.476 | Sumoylation      |      |
|                          |                                 |            | 270       | NIKLDL <b>K</b> YETLVKY       | 26.485 | Sumoylation      |      |

|  |           |                       |        |                     |
|--|-----------|-----------------------|--------|---------------------|
|  | 437       | PKAKPKAKKECPATC       | 16.996 | Sumoylation         |
|  | 552       | VQEKVCVKTSPYIEM       | 41.585 | Sumoylation         |
|  | 970 - 974 | IECKIQE IVITE KDGIKTT | 60.791 | SUMO<br>interaction |

The access number and sequence of proteins (already identified) that participate in *Entamoeba histolytica* phagocytosis were obtained from KEGG (<https://www.genome.jp/kegg>, 29/04/2021), AmoebaDB (<https://amoebadb.org/amoeba/app>, 29/04/2021) and NCBI (<https://www.ncbi.nlm.nih.gov>, 29/04/2021) databases. Then, these proteins were analysed using the GPS-SUMO 1.0 (<http://sumosp.biocuckoo.org>, 29/04/2021) program to predict SUMOylation sites.

The results displayed several hypothetical sites in the studied proteins, suggesting that this posttranslational modification could regulate their function during this virulence event.



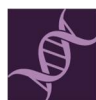

- [1] Y. S.-N. Kumiko Nakada-Tsukui and V. A. and T. Nozaki, "A Retromerlike Complex Is a Novel Rab7 Effector That Is Involved in the Transport of the Virulence Factor Cysteine Protease in the Enteric Protozoan Parasite *Entamoeba histolytica*," *Mol. Biol. Cell*, vol. 16, no. November, pp. 5356–5372, 2005, doi: 10.1091/mbc.E05.
- [2] I. Lpez-Reyes *et al.*, "Detection of the endosomal sorting complex required for transport in *entamoeba histolytica* and characterization of the EhVps4 protein," *J. Biomed. Biotechnol.*, vol. 2010, pp. 1–15, 2010, doi: 10.1155/2010/890674.
- [3] R. Javier-Reyna, S. Montañó, G. García-Rivera, M. A. Rodríguez, A. González-Robles, and E. Orozco, "EhRabB mobilises the EhCPADH complex through the actin cytoskeleton during phagocytosis of *Entamoeba histolytica*," *Cell. Microbiol.*, vol. 21, no. 10, 2019, doi: 10.1111/cmi.13071.
- [4] Y. Saito-Nakano, R. Wahyuni, K. Nakada-Tsukui, K. Tomii, and T. Nozaki, "Rab7D small GTPase is involved in phago-, trogocytosis and cytoskeletal reorganization in the enteric protozoan *Entamoeba histolytica*," *Cell. Microbiol.*, vol. 23, no. 1, 2021, doi: 10.1111/cmi.13267.
- [5] M. Babuta, M. S. Mansuri, S. Bhattacharya, and A. Bhattacharya, "The *Entamoeba histolytica* Arp2/3 Complex Is Recruited to Phagocytic Cups through an Atypical Kinase EhAK1," *PLoS Pathog.*, vol. 11, no. 12, pp. 1–27, 2015, doi: 10.1371/journal.ppat.1005310.
- [6] A. Sateriale, A. Vaithilingam, L. Donnelly, P. Miller, and C. D. Huston, "Feed-forward regulation of phagocytosis by *entamoeba histolytica*," *Infect. Immun.*, vol. 80, no. 12, pp. 4456–4462, 2012, doi: 10.1128/IAI.00671-12.
- [7] A. D. Campos-Parra, N. A. Hernández-Cuevas, R. Hernandez-Rivas, and M. Vargas, "EhNCABP166: A nucleocytoplasmic actin-binding protein from *Entamoeba histolytica*," *Mol. Biochem. Parasitol.*, vol. 172, no. 1, pp. 19–30, 2010, doi: 10.1016/j.molbiopara.2010.03.010.
- [8] H. Voigt, J. C. Olivo, P. Sansonetti, and N. Guillén, "Myosin IB from *Entamoeba histolytica* is involved in phagocytosis of human erythrocytes," *J. Cell Sci.*, vol. 112, no. 8, pp. 1191–1201, 1999.
- [9] D. R. Boettner *et al.*, "Entamoeba histolytica phagocytosis of human erythrocytes involves PATMK, a member of the transmembrane kinase family," *PLoS Pathog.*, vol. 4, no. 1, pp. 0122–0133, 2008, doi: 10.1371/journal.ppat.0040008.
- [10] J. Bolaños *et al.*, "EhNPC1 and EhNPC2 Proteins Participate in Trafficking of Exogenous Cholesterol in *Entamoeba histolytica* Trophozoites: Relevance for Phagocytosis," *PLoS Pathog.*, vol. 12, no. 12, pp. 1–29, 2016, doi: 10.1371/journal.ppat.1006089.
- [11] S. Sharma, S. Bhattacharya, and A. Bhattacharya, "PtdIns(4,5)P<sub>2</sub> is generated by a novel phosphatidylinositol 4-phosphate 5-kinase in the protist parasite *Entamoeba histolytica*," *FEBS J.*, vol. 286, no. 11, pp. 2216–2234, 2019, doi: 10.1111/febs.14804.
- [12] E. Labruyère, C. Zimmer, V. Galy, J. C. Olivo-Marin, and N. Guillén, "EhPAK, a member of the p21-activated kinase family, is involved in the control of *Entamoeba histolytica* migration and phagocytosis," *J. Cell Sci.*, vol. 116, no. 1, pp. 61–71, 2003, doi: 10.1242/jcs.00190.
- [13] Somlata, S. Bhattacharya, and A. Bhattacharya, "A C2 domain protein kinase initiates phagocytosis in the protozoan parasite *Entamoeba histolytica*," *Nat. Commun.*, vol. 2, no. 1, pp. 210–230, 2011, doi: 10.1038/ncomms1199.
- [14] S. Kumar *et al.*, "Crystal structure and trimer-monomer transition of N-terminal domain of EhCaBP1 from *entamoeba histolytica*," *Biophys. J.*, vol. 98, no. 12, pp. 2933–2942, 2010, doi: 10.1016/j.bpj.2010.03.048.
- [15] M. Valle-Solis *et al.*, "A Calcium/Cation Exchanger Participates in the Programmed Cell Death and in vitro Virulence of *Entamoeba histolytica*," *Front. Cell. Infect. Microbiol.*, vol. 8, no. October, p. 342, 2018, doi: 10.3389/fcimb.2018.00342.
- [16] O. S. b and M. D. Stephan Ortner, Barbara Plaimauer, Marina Binder, Gerhard Wiedermann, "Humoral immune response against a 70-kilodalton heat shock protein of *Entamoeba histolytica* in a group of patients with invasive amoebiasis," *Trends Parasitol.*, vol. 54, pp. 175–183, 2021, doi: 10.1016/j.pt.2021.01.001.
- [17] B. J. Mann, "Structure and function of the *Entamoeba histolytica* Gal/GalNAc lectin," *Int. Rev. Cytol.*, vol. 216, pp. 59–80, 2002, doi: 10.1016/S0074-7696(02)16003-7.
